# Supplementary material
Source: Springer Nature journal article supplement (https://www.springermedizin.de/resource/supplementary/13012_2010_304_MOESM1_ESM.pdf/9629678)
Supplement: MOESM1 [file 9629678]

**Nurses in Study Unit (n = 57)**  
Staff nurses (n = 54)  
Full-time (n = 29), Part-time (n = 16), Casual (n = 9)  
Nurse leaders (n = 3)  
Administrative (n = 1), Clinical (n = 1), Education (n = 1)

**Assessed for Eligibility (n = 24)**

**Eligible and Consented (n = 15)**  
Staff nurses (n = 12)  
Full-time (n = 10), Part-time (n = 2)  
Nurse leaders (n = 3)  
Administrative (n = 1), Clinical (n = 1), Education (n = 1)

**Eligible and Declined Participation (n = 9)**  
Maternity/paternity leave (n = 3)  
Away for AI sessions (n = 3)  
Transportation issues (n = 2)  
Scheduling conflict (n = 1)

**Sample Characteristics (6 weeks pre-AI sessions)**  
Nurse Entry Form (n = 15)

**AI Sessions (n = 12)**  
Four 3-hour sessions delivered over two weeks

**Withdrawal (n = 3)**  
Scheduling conflict (n = 1)  
Personal issue (n = 1)  
Time commitment (n = 1)

**Individual Interviews (6 months post-AI sessions; n = 12)**

**Withdrawal (n = 0)**
